# Supplementary material
Source: PubMed Central journal article supplement (PMC8390771)
Supplement: NIHMS1735263-supplement-Supplemental_Figures.pdf [file NIHMS1735263-supplement-Supplemental_Figures.pdf]

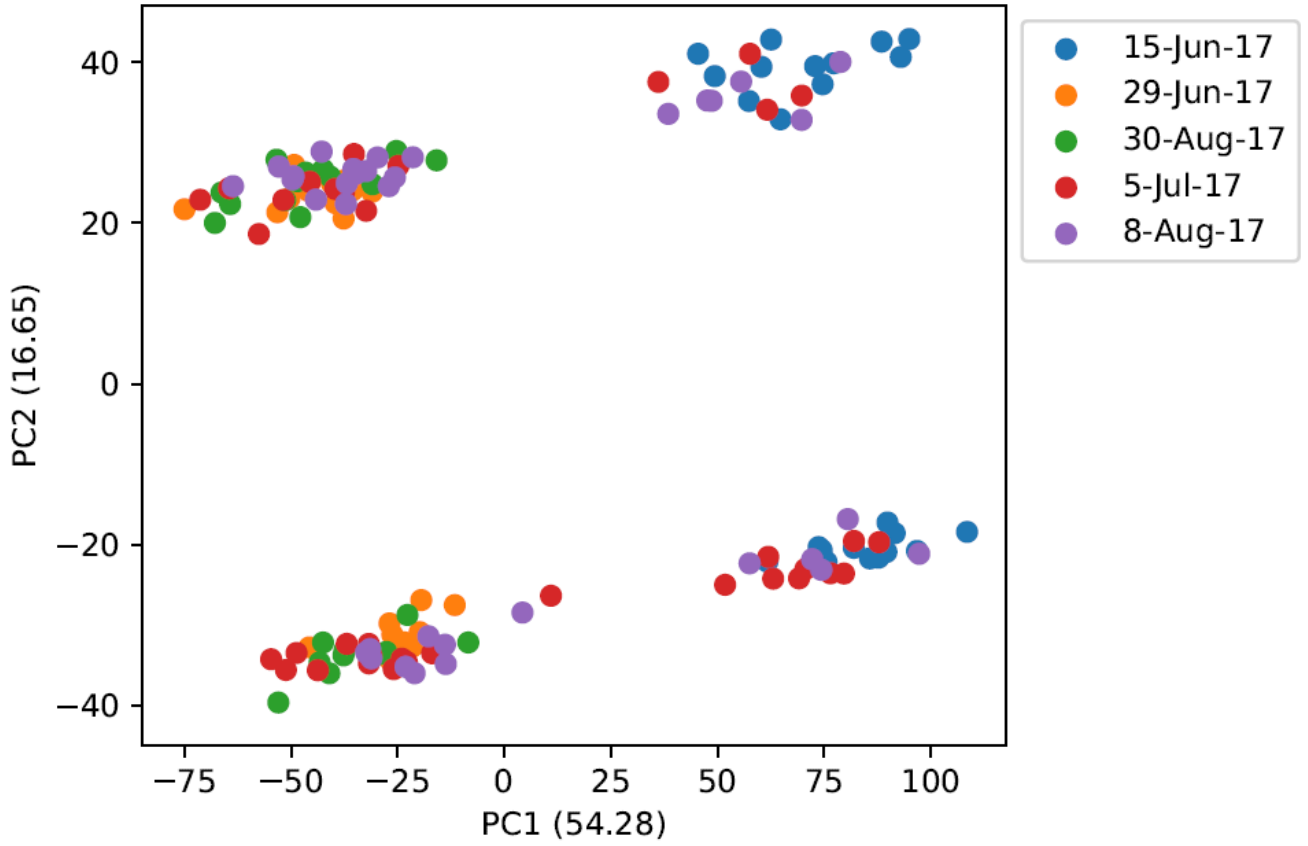

**Supplemental Fig S1. Principal component analysis reveals a bias in the data according to the date of the sequencing run.**

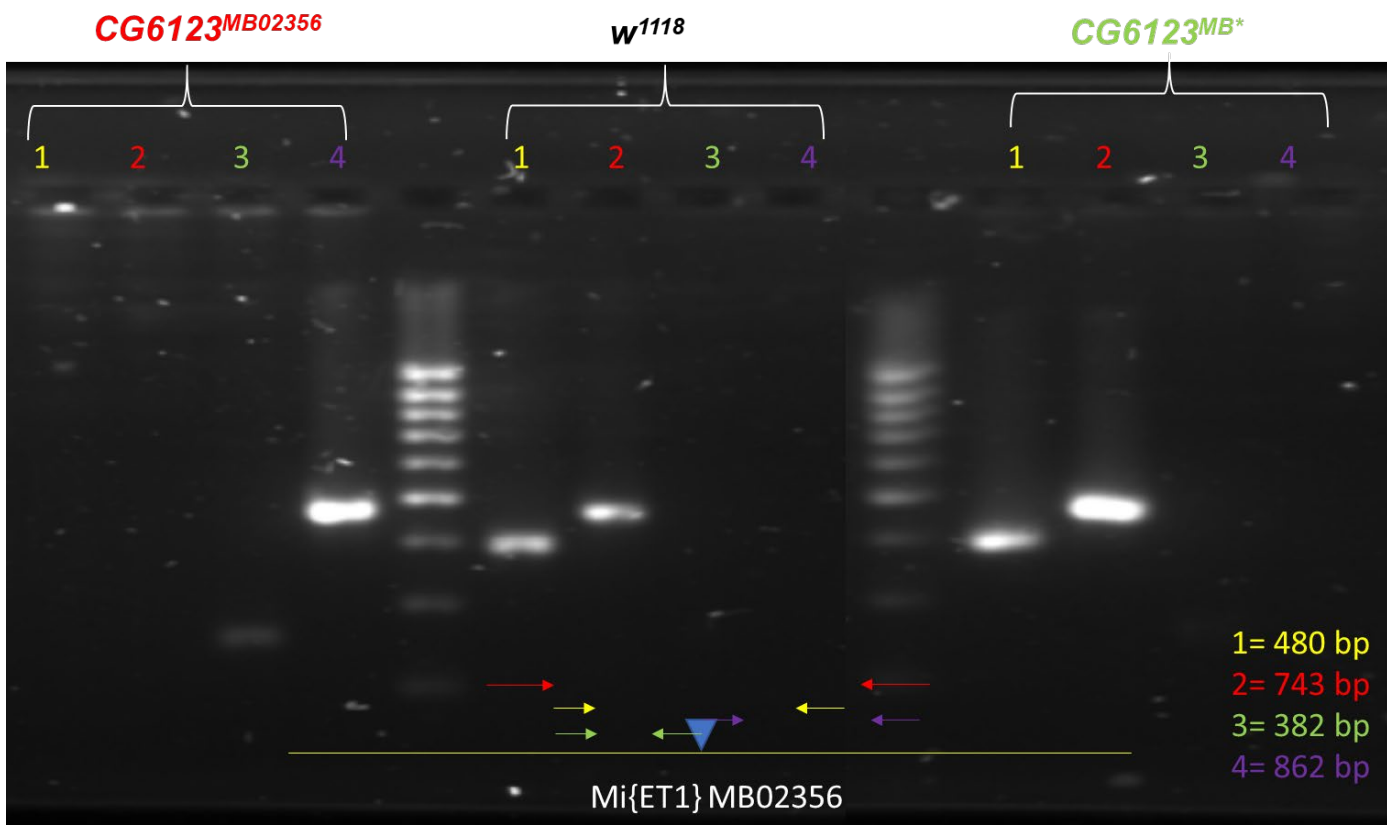

Supplemental Fig S2. Agarose gel showing genotyping strategy used for determining the presence of *Minos* insertion in the *CG6123* genomic region as well as its precise excision in the rescued line. Yellow and red denote the oligos used for PCR amplification flanking the *Minos* insertion whereas green and purple arrows denote the oligos used for checking the presence of the *Minos* insertion in the original *CG6123*<sup>MB02356</sup> mutant.

X:18,337,903 w<sup>1118</sup>,CG6123<sup>MB02356</sup>

insertion site

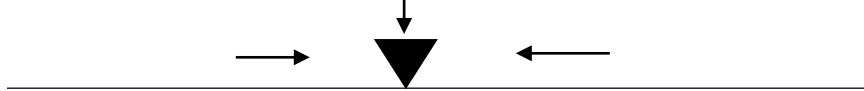

>gnl|dmel|X type=golden\_path\_region; loc=X:1..23542271; ID=X; dbxref=GB:AE014298, GB:AE014298, REFSEQ:NC\_004354; MD5=f7228bbf9f8fa0af457bc2fb7e396e4d; length=23542271; release=r6.30; species=Dmel; Length = 23542271

HSP # = 1 , Score = 860.835 bits (434) , Expect = 0  
Identities = 587 / 632 (92.9%) , Positives = 587 / 632 (92.9%) , Gaps = 11 / 632 (1.7%)  
Strand = Plus / Minus

| GBrowse           | Subject FASTA                                                            |
|-------------------|--------------------------------------------------------------------------|
| Query: 21         | ATGTGGTGGAA-CTTTTGCATACTAGGCTCCAAGGGA--GGGGGGCTGATGATGAAAACA 77          |
| Subject: 18338392 | ATGTGGTGGAACTTTTGCATACTAGGCTCCAAGGAATGGGGGGCTGATGATGAAAACA 18338333      |
| Query: 78         | TATCGAATCGAATTTAAAGCTAACAAGGTCCTACTCTAAAAGCTGNNNNNNNNNNNNNNN 137         |
| Subject: 18338332 | TATCGAATCGAATTTAAAGCTAACAAGGTCCTACTCTAAAAGCTGAAAAAAAAAAAAAAC 18338273    |
| Query: 138        | -TACCGATGGGACAAAACGACAAGCCGAACTTAATTATGCGATTTTATGGGGGTATTTG 196          |
| Subject: 18338272 | ATACCGATGGCACAAAACGACAAGCCGAGACTTAATTATGCGATTTTATGTGGGTATTTG 18338213    |
| Query: 197        | CACAAAATAAATGTATTGATTGCCCCCTCTGCGAGTCTCAAGTTTTCCCTGGAACTTT 256           |
| Subject: 18338212 | CACAGAAAATAAATGTATTGATTGCCCGCTCTGCGAGTCTCAAGTTTTCACTGGAACTTT 18338153    |
| Query: 257        | CAACTTTGATCAAAAGCAGCTGCGCGATGAAAATCCGCTCCGGCATTAAAGGGGCTTTTC 316         |
| Subject: 18338152 | CAACTTTGATCAAAAGCAGCTGCGCGATGATAATCCGCTCCGGCATTAAAGGGGCTTTTC 18338093    |
| Query: 317        | CAGTAAATGTTTAAATTAATAAACAARAATCAAACTGACGCGGGCGGAACACCCACATCCGT 376       |
| Subject: 18338092 | CAGTAAATGTTTAAATTAGATAAACAARAATCAAACTGACGCGGGCGGAGCACCCACATCCGT 18338033 |
| Query: 377        | CGACCCGACGACCCGACGACCCGGAAGCCATGGGGTTCGCATACCCATCCGTATCCGTAT 436         |
| Subject: 18338032 | CGACCCGACGACCCGACGACCCGGAAGCCATGTGGTTCGCATACGCATCCGTATCCGTAT 18337973    |
| Query: 437        | CCGCATCTGTATTCCCATCCGGATCCGTATTCGGTTGCGTACCAGGGGATGGCATCGTAT 496         |
| Subject: 18337972 | CCGCATCTGTATTTCGCATCCGGATCCGTATTCGGTTGCGTACCAGGTGATGGCATCGTAT 18337913   |
| Query: 497        | GGATGTACATATGTAATGCATTAATTGCGGCACCCCAACTTCGTTAA--TAACAATTA 554           |
| Subject: 18337912 | GGATGTACATATGTAGATGCATTAATTGCGGCACCCCAACTTCGTTAAATAACAATTA 18337853      |
| Query: 555        | ATTAATGGCTGTGGGGAGTGACCGAGCATTATGAATGAT-AATCATGCATG-TTCACTGC 612         |
| Subject: 18337852 | ATTAATGGCTGTGGGGAGTGACCGAGCATTATGAATGATAAATCATGCATGTTTCACTGC 18337793    |
| Query: 613        | TGA-TATTT-CCAATGA-TCTATGTATATTTA 641                                     |
| Subject: 18337792 | TGATTATTTCCCAATGATTCTATGTATATTTA 18337761                                |

Supplemental Fig S3. Top panel shows the presence of the *Minos* insertion in the *CG6123* genomic region. Black flanking arrows denote the oligos used for Sanger based sequencing. Lower panel shows the snapshot of nucleotide blast of *w*<sup>1118</sup> control line. The transparent red box denotes the location of the *Minos* insertion in the original mutant of *CG6123*.

X:18,337,903 w<sup>1118</sup>,CG6123<sup>MB02356</sup>

insertion site

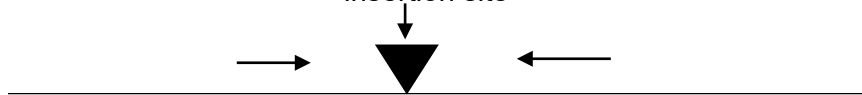

>gnl|dmel|X type=golden\_path\_region; loc=X:1..23542271; ID=X; dbxref=GB:AE014298, GB:AE014298, REFSEQ:NC\_004354; MD5=f7228bbf9f8fa0af457bc2fb7e396e4d; length=23542271; release=r6.30; species=Dmel; Length = 23542271

HSP # = 1 , Score = 448.505 bits (226) , Expect = 1.18976e-124  
Identities = 431 / 511 (84.3%) , Positives = 431 / 511 (84.3%) , Gaps = 4 / 511 (0.8%)  
Strand = Plus / Minus

| GBrowse           | Subject FASTA                                                          |
|-------------------|------------------------------------------------------------------------|
| Query: 23         | ATGTGGTGGAA-CTTTTGCATACTAGGCTCCAAGGGA--GGGGGGCTGATGATGAAAACA 79        |
| Subject: 18338392 | ATGTGGTGGAAACTTTTGCATACTAGGCTCCAAGGAATGGGGGGCTGATGATGAAAACA 18338333   |
| Query: 80         | TATCGAATCGAATTTAAAGCTACAAGGTCCACTCTAAAAGCTGNNNNNNNNNNNNNNNN 139        |
| Subject: 18338332 | TATCGAATCGAATTTAAAGCTACAAGGTCCACTCTAAAAGCTGAAAAAAAAAAAAAAAAAC 18338273 |
| Query: 140        | -TACCGATGGGGCAAACAACAGCCGAAAATTATTTATGCGATTTTTTGTGGGTATTG 198          |
| Subject: 18338272 | ATACCGATGGCACAACAACAGCCGAGACTTAATTATGCGATTTTATGTGGGTATTG 18338213      |
| Query: 199        | CCNNNNNNNTTGTGTTTATTGNNNNNNNNTGCGAGTCTCAAGTTTTCCCTGGAACTT 258          |
| Subject: 18338212 | CACAGAAATAATTGTATTGATTGCCGCTCTGCGAGTCTCAAGTTTTCACTGGAACTT 18338153     |
| Query: 259        | CAACTTTTATCAAAAACAGCTGCGCGATGAAAATNNNNNNNGGCATTAAGGGGTTTTC 318         |
| Subject: 18338152 | CAACTTTGATCAAAAACAGCTGCGCGATGATAATCCGCTCCGGCATTAAAGGGGCTTTTC 18338093  |
| Query: 319        | CCCTAAATGTTTAATTAATNNNNNNNTCAAATCTGACGCGGGGAGCACCCCCCTCGT 378          |
| Subject: 18338092 | CAGTAAATGTTTAATTAGATAAACAATCAAATCTGACGCGGGGAGCACCCACATCCGT 18338033    |
| Query: 379        | CGACCCACGACCCACGACCCGGAAGCCATGGGGTTCGCATACGCATCCGTATCCGTAT 438         |
| Subject: 18338032 | CGACCCGACGACCCGACCCGGAAGCCATGTGGTTCGCATACGCATCCGTATCCGTAT 18337973     |
| Query: 439        | CCCCATCTGTATCCCATCCGGATCCGTATTCGGTTGGGTACCAGGGGATGGCATCCTAT 498        |
| Subject: 18337972 | CCGCATCTGTATCCCATCCGGATCCGTATTCGGTTGCGTACCAGGTGATGGCATCCTAT 18337913   |
| Query: 499        | GGAGGTACATATGTAGATGCATTAATTGCGG 529                                    |
| Subject: 18337912 | GGATGTACATATGTAGATGCATTAATTGCGG 18337882                               |

**Supplemental Fig S4. Top panel shows the presence of the *Minos* insertion in the *CG6123* genomic region. Black flanking arrows denote the oligos used for Sanger based sequencing. Lower panel shows the snapshot of nucleotide blast of rescued *CG6123 Minos* insertion line. The transparent red box denotes the location of the original *Minos* insertion.**
